# Supplementary material for: Composition of the isopropanol-soluble portion and fast pyrolysis product distribution of the insoluble part from Pakistani lignite
Source: PubMed Central journal article supplement — RSC Adv. 2025 Jan 7;15(1):602–15. doi: 10.1039/d4ra07749k (PMC11704879; doi:10.1039/d4ra07749k), 2025-01-07
Supplement: RA-015-D4RA07749K-s001.pdf [file RA-015-D4RA07749K-s001.pdf]

## Supplementary Material

### Composition of the isopropanol soluble portion and fast pyrolysis products distribution of the insoluble part from Pakistan lignite

Gui-han ZHAO<sup>a,b</sup>, Ya-ya MA<sup>a</sup>, Yuan REN<sup>a</sup>, Jun XIAO<sup>a</sup>, Wen-Long MO<sup>\*a,b</sup>, Jia GUO<sup>b\*</sup>, Xian-Yong WEI<sup>a</sup>, Xing FAN<sup>a</sup>, Akram NAEEM<sup>c</sup>

<sup>a</sup> State Key Laboratory of Carbon Based Energy Resource Chemistry and Utilization, Xinjiang Key Laboratory of Clean Coal Transformation and Chemical Process, College of Chemical Engineering, Xinjiang University, Urumqi 830046, Xinjiang, China;

<sup>b</sup> Xinjiang Energy Co., LTD, Urumqi 830000, Xinjiang, China;

<sup>c</sup> School of Chemical Engineering, Minhaj University Lahore, Lahore 54000, Punjab, Pakistan.

Corresponding Author, Tel: 15022994903, E-mail address: mowenlong@xju.edu.cn

**Table S1**  
Alkanes detected in the SP

| Peak | RT (min) | Compound name                         | RC (%) |
|------|----------|---------------------------------------|--------|
| 40   | 9.86     | Dodecane                              | 0.27   |
| 55   | 11.34    | Tridecane                             | 0.60   |
| 70   | 12.71    | Tetradecane                           | 0.55   |
| 80   | 13.51    | Pentadecane, 7-methyl-                | 0.60   |
| 85   | 13.99    | Pentadecane                           | 0.60   |
| 108  | 15.76    | Hexadecane, 2,6,10,14-tetramethyl-    | 0.37   |
| 114  | 16.33    | Hexadecane                            | 0.36   |
| 115  | 16.40    | Pentadecane, 2,6,10,14-tetramethyl-   | 0.48   |
| 120  | 16.80    | Cyclohexane, 2-butyl-1,1,3-trimethyl- | 0.68   |
| 127  | 17.42    | Decane, 3-methyl-                     | 0.42   |
| 138  | 18.45    | Pentadecane, 8-hexyl-                 | 0.47   |
| 146  | 19.43    | Heptadecane                           | 0.17   |
| 153  | 20.37    | Heptadecane, 2,6,10,15-tetramethyl-   | 0.27   |
| 160  | 21.28    | Pentadecane, 8-heptyl-                | 0.21   |
| 167  | 22.14    | Heptadecane, 8-methyl-                | 0.31   |
| 171  | 22.97    | Heptadecane, 9-octyl-                 | 0.53   |
| 177  | 23.78    | Nonadecane, 9-methyl-                 | 0.52   |

|     |       |             |      |
|-----|-------|-------------|------|
| 184 | 24.55 | Nonadecane  | 0.66 |
| 190 | 25.29 | Eicosane    | 0.83 |
| 195 | 26.01 | Heneicosane | 1.06 |
| 202 | 26.70 | Docosane    | 0.93 |
| 208 | 27.38 | Tetracosane | 0.42 |

**Table S2**

Alkenes detected in the SP

| Peak | RT (min) | Compound name                               | RC (%) |
|------|----------|---------------------------------------------|--------|
| 57   | 11.55    | Ethyl-tetramethyl-cyclopentadiene           | 0.05   |
| 62   | 11.89    | 1,3-Cyclohexadiene, 1,2,3,4,5,6-hexamethyl- | 0.26   |
| 72   | 12.82    | 1,3-Cyclohexadiene, 1,2,3,4,5,6-hexamethyl- | 0.39   |
| 118  | 16.68    | 1-Heptene, 2-isohexyl-6-methyl-             | 0.62   |
| 120  | 16.80    | Cyclohexane, 2-butyl-1,1,3-trimethyl-       | 0.68   |

**Table S3**

Arenes detected in the SP

| Peak | RT (min) | Compound name                                                                            | RC (%) |
|------|----------|------------------------------------------------------------------------------------------|--------|
| 14   | 5.97     | Benzene, 1,2,3-trimethyl-                                                                | 0.15   |
| 33   | 8.99     | 1H-Indene, 2,3-dihydro-5-methyl-                                                         | 0.10   |
| 34   | 9.17     | 1H-Indene, 2,3-dihydro-4-methyl-                                                         | 0.34   |
| 41   | 9.92     | 1H-Indene, 2,3-dihydro-1,1-dimethyl-                                                     | 0.14   |
| 53   | 11.20    | 2,2-Dimethylindene, 2,3-dihydro-<br>Benzene, 1-(1-methylethenyl)-3-(1-<br>methylethyl)-  | 0.13   |
| 61   | 11.83    |                                                                                          | 0.40   |
| 74   | 12.95    | Naphthalene, 1,6-dimethyl-                                                               | 0.23   |
| 75   | 13.04    | Benzene, hexamethyl-                                                                     | 0.23   |
| 79   | 13.47    | Benzene, 1,2,4-trimethyl-5-(1-methylethyl)-                                              | 0.16   |
| 81   | 13.60    | Benzene, 1,4-bis(1-methylethyl)-                                                         | 0.16   |
| 83   | 13.73    | Benzene, 1-(1,1-dimethylethyl)-3,5-dimethyl-                                             | 0.43   |
| 92   | 14.39    | 1,1,4,5,6-pentamethyl-2,3-dihydro-1H-indene                                              | 1.10   |
| 93   | 14.54    | Naphthalene, 2,3,6-trimethyl-                                                            | 0.22   |
| 95   | 14.69    | Benzene, 1,2-diethyl-3,4-dimethyl-                                                       | 0.18   |
| 96   | 14.74    | Benzene, 1,3,5-triethyl-<br>Benzene, 1-(1,1-dimethylethyl)-3-ethyl-5-<br>methyl-         | 0.22   |
| 98   | 14.85    |                                                                                          | 0.22   |
| 99   | 14.92    | Naphthalene, 1,6,7-trimethyl-                                                            | 0.97   |
| 103  | 15.25    | Naphthalene, 2,3,6-trimethyl-                                                            | 0.39   |
| 105  | 15.60    | Benzene, 1,2,4,5-tetraethyl-                                                             | 0.38   |
| 113  | 16.24    | Benzene, 1-ethyl-3,5-diisopropyl-<br>Naphthalene, 3-(1,1-dimethylethyl)-1,2-<br>dihydro- | 0.39   |
| 116  | 16.51    |                                                                                          | 0.48   |
| 117  | 16.62    | 2,2'-Dimethylbiphenyl                                                                    | 0.30   |
| 119  | 16.74    | 1,1'-Biphenyl, 2,3'-dimethyl-                                                            | 0.16   |
| 121  | 16.86    | 1-(4-Tolyl)-1-cyclohexene                                                                | 0.20   |
| 122  | 16.93    | 2,2'-Dimethylbiphenyl                                                                    | 0.41   |

|     |       |                                                                                         |      |
|-----|-------|-----------------------------------------------------------------------------------------|------|
| 126 | 17.27 | Benzene, nonyl-                                                                         | 0.30 |
| 132 | 17.79 | Benzene, 1-methyl-2-[(4-methylphenyl)methyl]-<br>s-Indacene, 1,2,3,5,6,7-hexahydro-4,8- | 0.20 |
| 135 | 18.09 | dimethyl-                                                                               | 0.24 |
| 137 | 18.35 | Benzene, undecyl-                                                                       | 0.38 |
| 139 | 18.61 | 1,1'-Biphenyl, 3-(1-methylethyl)-<br>Phenanthrene, 9-butyl-1,2,3,4,5,6,7,8-             | 0.12 |
| 140 | 18.71 | octahydro-                                                                              | 0.15 |
| 143 | 18.95 | Anthracene, 1-methyl-                                                                   | 0.20 |
| 145 | 19.38 | Benzene, tridecyl-                                                                      | 0.13 |
| 150 | 20.12 | Naphthalene, 1,2-dihydro-4-phenyl-                                                      | 0.20 |
| 156 | 20.99 | Naphthalene, 1-phenyl-                                                                  | 0.06 |
| 158 | 21.16 | Phenanthrene, 2,3,5-trimethyl-                                                          | 0.03 |
| 163 | 21.91 | 1H-Benzo[b]fluorene                                                                     | 0.06 |
| 164 | 21.96 | Pyrene, 1-methyl-                                                                       | 0.03 |
| 165 | 22.02 | Naphthalene, 1-(phenylmethyl)-                                                          | 0.08 |
| 166 | 22.10 | 9-Phenyl-5H-benzocycloheptene                                                           | 0.10 |
| 168 | 22.36 | Benzene, 1,1'-(1,3,5-hexatriene-1,6-diyl)bis-                                           | 0.07 |
| 174 | 23.27 | o-Terphenyl                                                                             | 0.14 |
| 192 | 25.47 | Naphthacene, 5-(1-naphthalenyl)-                                                        | 0.24 |
| 209 | 27.43 | A'-Neogammacer-22(29)-ene                                                               | 0.46 |
| 213 | 28.16 | Anthracene, 9-(3-butenyl)-                                                              | 1.04 |

**Table S4**  
OCOCs detected in the SP

| Peak | RT (min) | Compound name                                 | RC (%) |
|------|----------|-----------------------------------------------|--------|
| 4    | 2.29     | 2-Pentanol, 2-methyl-                         | 0.17   |
| 5    | 2.36     | Methyl Isobutyl Ketone                        | 0.40   |
| 6    | 2.48     | 4-Penten-2-one, 4-methyl-                     | 0.06   |
| 7    | 2.53     | 2-Hexanol                                     | 0.31   |
| 8    | 2.91     | 2-Hexanone                                    | 0.04   |
| 9    | 2.96     | 3-Buten-2-one, 3-methyl-                      | 0.03   |
| 10   | 3.02     | 3-Penten-2-one, 4-methyl-                     | 0.98   |
| 11   | 3.66     | Butanoic acid, 1-methylethyl ester            | 0.02   |
| 12   | 4.56     | Butanoic acid, 3-methyl-, 1-methylethyl ester | 0.03   |
| 13   | 5.41     | Pentanoic acid, 1-methylethyl ester           | 0.03   |
| 15   | 6.37     | 2-Hexanone, 4-methyl-                         | 0.03   |
| 16   | 6.48     | Phenol                                        | 1.08   |
| 22   | 7.29     | Cyclohexanone, 3,3,5-trimethyl-               | 0.06   |
| 24   | 7.76     | Phenol, 2-methyl-                             | 0.53   |
| 26   | 8.11     | p-Cresol                                      | 0.73   |
| 27   | 8.24     | Phenol, 3-methyl-                             | 0.57   |
| 30   | 8.51     | p-Cresol                                      | 0.36   |
| 31   | 8.76     | Acetic acid, 4-methylphenyl ester             | 0.14   |

|     |       |                                                                |      |
|-----|-------|----------------------------------------------------------------|------|
| 32  | 8.85  | Heptanoic acid, propyl ester                                   | 0.03 |
| 35  | 9.29  | Phenol, 3,4-dimethyl-                                          | 0.35 |
| 36  | 9.36  | Phenol, 2,5-dimethyl-                                          | 0.21 |
| 37  | 9.63  | Phenol, 3-ethyl-                                               | 0.76 |
| 39  | 9.76  | Phenol, 3,5-dimethyl-                                          | 0.44 |
| 42  | 10.06 | Phenol, 3-(1-methylethyl)-                                     | 0.58 |
| 43  | 10.19 | Phenol, 4-ethyl-                                               | 0.14 |
| 45  | 10.41 | Phenol, 2-propyl-                                              | 0.04 |
| 46  | 10.49 | Phenol, 3-ethyl-5-methyl-                                      | 0.49 |
| 48  | 10.64 | Phenol, 2-ethyl-5-methyl-                                      | 0.35 |
| 49  | 10.71 | Phenol, 2-ethyl-4-methyl-                                      | 0.22 |
| 50  | 11.02 | Phenol, 3-(1-methylethyl)-                                     | 0.37 |
| 51  | 11.06 | 3,4-Dimethylbenzyl alcohol                                     | 0.14 |
| 52  | 11.14 | Phenol, 2,3,5-trimethyl-                                       | 0.18 |
| 54  | 11.27 | 3-Methyl-4-isopropylphenol                                     | 0.32 |
| 56  | 11.43 | Phenol, 2-methyl-5-(1-methylethyl)-                            | 0.26 |
| 58  | 11.63 | Phenol, 2,3,6-trimethyl-                                       | 0.19 |
| 59  | 11.67 | Thymol                                                         | 0.16 |
| 60  | 11.74 | Ethanone, 1-(2-hydroxy-5-methylphenyl)-                        | 0.47 |
| 64  | 12.09 | 1-Penten-3-one, 1-phenyl-                                      | 0.08 |
| 65  | 12.15 | 1H-Inden-5-ol, 2,3-dihydro-                                    | 0.37 |
| 68  | 12.39 | Bicyclo[3.1.1]hept-3-en-2-one, 4,6,6-trimethyl-                | 0.38 |
| 69  | 12.59 | Benzene, 1-butyl-4-methoxy-                                    | 0.30 |
| 71  | 12.77 | Ethanone, 1-(4-ethylphenyl)-                                   | 0.46 |
| 73  | 12.90 | Benzene, 1-(1,1-dimethylethyl)-4-ethoxy-                       | 0.32 |
| 77  | 13.28 | 2-Propanone, 1-(3,5,5-trimethyl-2-cyclohexen-1-ylidene)-, (E)- | 0.65 |
| 78  | 13.41 | 5-Formyl-2,2-dimethyl-1,3-benzodioxole                         | 0.42 |
| 90  | 14.24 | 4-Hydroxy-2,4,5-trimethyl-2,5-cyclohexadien-1-one              | 0.36 |
| 91  | 14.32 | 3,7-Benzofurandiol, 2,3-dihydro-2,2-dimethyl-                  | 0.29 |
| 94  | 14.63 | Benzofuran, 2,3-dihydro-2,2,4,6-tetramethyl-                   | 0.59 |
| 100 | 15.02 | 2,3,5,6-Tetramethylacetophenone                                | 0.23 |
| 101 | 15.10 | Pentamethylbenzaldehyde                                        | 0.27 |
| 102 | 15.19 | Benzofuran, 2,3-dihydro-2,2,5,6-tetramethyl-                   | 0.63 |
| 104 | 15.36 | 3-Hydroxy-4-methoxybenzoic acid                                | 0.42 |
| 106 | 15.65 | Phenol, 2-(1,1-dimethyl-2-propenyl)-3,6-dimethyl-              | 0.24 |
| 107 | 15.71 | 1-Naphthalenol, 2-methyl-                                      | 0.27 |
| 125 | 17.19 | 1-Naphthol, 6,7-dimethyl-                                      | 0.40 |
| 129 | 17.61 | 2-Propenoic acid, 3-(4-methoxyphenyl)-, (E)-                   | 0.17 |
| 130 | 17.66 | 1-Naphthalenecarboxaldehyde, 4-methoxy-                        | 0.18 |
| 133 | 17.91 | Ethanone, 1-(2-hydroxy-1-naphthalenyl)-                        | 0.32 |
| 136 | 18.17 | 1-Naphthalenecarboxaldehyde, 2-methoxy-                        | 0.21 |

|     |       |                                                                            |      |
|-----|-------|----------------------------------------------------------------------------|------|
| 142 | 18.84 | 5H-Dibenzo[a,d]cyclohepten-5-ol, 10,11-dihydro-                            | 0.23 |
| 149 | 20.02 | 7H-Furo(3,2-g)(1)benzopyran-7-one, 4-(2,3-epoxy-3-methylbutoxy)-, (S)-(-)- | 0.21 |
| 151 | 20.20 | 2(3H)-Phenanthrenone, 4,4a,9,10-tetrahydro-4a-methyl-                      | 0.17 |
| 162 | 21.50 | 4,9(11)-Androstadiene-3,17-dione                                           | 0.02 |
| 178 | 23.82 | Phenol, 3-pentadecyl-                                                      | 0.26 |
| 186 | 24.73 | Docosanoic acid                                                            | 0.23 |
| 211 | 27.84 | .beta.-Tocopherol                                                          | 0.47 |
| 212 | 27.96 | .gamma.-Tocopherol                                                         | 0.80 |
| 214 | 28.26 | 4,7-Methanoindan, 3a,4,7,7a-tetrahydro-1,2-epoxy-4,5,6,7,8,8-hexachloro-   | 0.22 |
| 223 | 31.55 | Triacotanoic acid                                                          | 0.39 |

**Table S5**  
NCOCs detected in the SP

| Peak | RT (min) | Compound name                                                        | RC (%) |
|------|----------|----------------------------------------------------------------------|--------|
| 3    | 1.85     | Hydrazine, ethyl-                                                    | 0.16   |
| 21   | 7.21     | m-Aminophenylacetylene                                               | 0.09   |
| 23   | 7.47     | Fampridine                                                           | 0.05   |
| 110  | 15.98    | N,N-Diethyl-3-nitroaniline                                           | 0.38   |
| 111  | 16.07    | 1H-Pyrazole, 3-methyl-1-phenyl-                                      | 0.32   |
| 112  | 16.12    | Benzenacetamide, N-allyl-                                            | 0.37   |
| 123  | 17.02    | 4-Pyrimidinamine, 2-chloro-N-cyclopropyl-5-fluoro-                   | 0.20   |
| 124  | 17.08    | 2H-Isoindole, 4,5,6,7-tetramethyl-                                   | 0.24   |
| 128  | 17.53    | 1,2-Dimethyl-3-formylindole                                          | 0.20   |
| 134  | 17.97    | 2-Benzothiazolamine, 4-chloro-                                       | 0.22   |
| 144  | 19.19    | Tetrahydrozoline                                                     | 0.40   |
| 148  | 19.68    | Lumiflavine                                                          | 0.15   |
| 152  | 20.32    | 2,5-Dimethyl-4-(3-amino-4-methylphenyl)pyridine                      | 0.04   |
| 155  | 20.89    | 9-Acridinamine, 1,2,3,4-tetrahydro-2-methyl-                         | 0.05   |
| 159  | 21.23    | 2,5-Diaminobenzophenone                                              | 0.02   |
| 161  | 21.44    | 2-Buten-1-ol, 2-methyl-4-(1H-purin-6-ylamino)-, (E)-                 | 0.05   |
| 169  | 22.49    | Azepino[4,5-b]indole, 1,2,3,4,5,6-hexahydro-5-phenyl-                | 0.17   |
| 170  | 22.77    | 1-Phenyl-3-(3-nitrophenyl)-2-pyrazoline                              | 0.07   |
| 172  | 23.08    | Quinoline, 8-methyl-2-(2-methylphenyl)-                              | 0.13   |
| 175  | 23.41    | Benzo[a]phenazine, 7-oxide                                           | 0.17   |
| 176  | 23.48    | 4-(2-Chloroethylthio)-N,N-diethyl-6-methylthio-1,3,5-triazin-2-amine | 0.14   |
| 185  | 24.70    | 6-Methoxy-1-methyl-2-phenyl-4(1H)-                                   | 0.15   |

|     |       |                                            |      |
|-----|-------|--------------------------------------------|------|
|     |       | quinolinone (eduline)                      |      |
|     |       | 5-Quinolinesulfonamide, N-ethyl-8-methoxy- |      |
| 189 | 25.20 | N-phenyl-                                  | 0.30 |
| 193 | 25.68 | Pyrazine, 2-methyl-5-(2-propenyl)-         | 0.36 |
| 196 | 26.14 | Benzoic acid, pentachloro-                 | 0.26 |
|     |       | Isonipecotic acid, N-(4-fluoro-2-          |      |
| 207 | 27.16 | trifluoromethylbenzoyl)-, isohexyl ester   | 0.62 |
| 216 | 28.48 | 7H-Dinaphtho[2,3-b:2',3'-h]carbazole       | 0.39 |
|     |       | Pyrido[2,3-d]pyrimidine-2,4(1H,3H)-dione,  |      |
| 222 | 30.38 | 1,3-dimethyl-                              | 0.07 |

---

**Table S6**

Alcohols detected in the OCOCs

| Peak | Compound name                                                            | RC (%) |
|------|--------------------------------------------------------------------------|--------|
| 4    | 2-Pentanol, 2-methyl-                                                    | 0.17   |
| 7    | 2-Hexanol                                                                | 0.31   |
| 51   | 3,4-Dimethylbenzyl alcohol                                               | 0.14   |
| 65   | 1H-Inden-5-ol, 2,3-dihydro-                                              | 0.39   |
| 91   | 3,7-Benzofurandiyl, 2,3-dihydro-2,2-dimethyl-                            | 0.29   |
| 125  | 1-Naphthol, 6,7-dimethyl-                                                | 0.4    |
| 142  | 5H-Dibenzo[a,d]cyclohepten-5-ol, 10,11-dihydro-                          | 0.23   |
| 214  | 4,7-Methanoindan, 3a,4,7,7a-tetrahydro-1,2-epoxy-4,5,6,7,8,8-hexachloro- | 0.22   |

**Table S7**

Ketones detected in the OCOCs

| Peak | Compound name                                                              | RC (%) |
|------|----------------------------------------------------------------------------|--------|
| 5    | Methyl Isobutyl Ketone                                                     | 0.4    |
| 6    | 4-Penten-2-one, 4-methyl-                                                  | 0.06   |
| 8    | 2-Hexanone                                                                 | 0.04   |
| 9    | 3-Buten-2-one, 3-methyl-                                                   | 0.03   |
| 10   | 3-Penten-2-one, 4-methyl-                                                  | 0.98   |
| 15   | 2-Hexanone, 4-methyl-                                                      | 0.03   |
| 22   | Cyclohexanone, 3,3,5-trimethyl-                                            | 0.06   |
| 60   | Ethanone, 1-(2-hydroxy-5-methylphenyl)-                                    | 0.47   |
| 64   | 1-Penten-3-one, 1-phenyl-                                                  | 0.08   |
| 68   | Bicyclo[3.1.1]hept-3-en-2-one, 4,6,6-trimethyl-                            | 0.38   |
| 71   | Ethanone, 1-(4-ethylphenyl)-                                               | 0.46   |
| 77   | 2-Propanone, 1-(3,5,5-trimethyl-2-cyclohexen-1-ylidene)-, (E)-             | 0.65   |
| 90   | 4-Hydroxy-2,4,5-trimethyl-2,5-cyclohexadien-1-one                          | 0.36   |
| 100  | 2,3,5,6-Tetramethylacetophenone                                            | 0.23   |
| 133  | Ethanone, 1-(2-hydroxy-1-naphthalenyl)-                                    | 0.32   |
| 149  | 7H-Furo(3,2-g)(1)benzopyran-7-one, 4-(2,3-epoxy-3-methylbutoxy)-, (S)-(-)- | 0.21   |
| 151  | 2(3H)-Phenanthrenone, 4,4a,9,10-tetrahydro-4a-methyl-                      | 0.17   |
| 162  | 4,9(11)-Androstadiene-3,17-dione                                           | 0.02   |

**Table S8**

Esters detected in the OCOCs

| Peak | Compound name                                 | RC (%) |
|------|-----------------------------------------------|--------|
| 11   | Butanoic acid, 1-methylethyl ester            | 0.02   |
| 12   | Butanoic acid, 3-methyl-, 1-methylethyl ester | 0.03   |
| 13   | Pentanoic acid, 1-methylethyl ester           | 0.03   |
| 31   | Acetic acid, 4-methylphenyl ester             | 0.14   |
| 32   | Heptanoic acid, propyl ester                  | 0.03   |

**Table S9**

## Phenols detected in the OCOCs

| Peak | Compound name                                     | RC (%) |
|------|---------------------------------------------------|--------|
| 16   | Phenol                                            | 1.08   |
| 24   | Phenol, 2-methyl-                                 | 0.53   |
| 26   | p-Cresol                                          | 0.73   |
| 27   | Phenol, 3-methyl-                                 | 0.57   |
| 30   | p-Cresol                                          | 0.36   |
| 35   | Phenol, 3,4-dimethyl-                             | 0.35   |
| 36   | Phenol, 2,5-dimethyl-                             | 0.21   |
| 37   | Phenol, 3-ethyl-                                  | 0.76   |
| 39   | Phenol, 3,5-dimethyl-                             | 0.44   |
| 42   | Phenol, 3-(1-methylethyl)-                        | 0.58   |
| 43   | Phenol, 4-ethyl-                                  | 0.14   |
| 45   | Phenol, 2-propyl-                                 | 0.04   |
| 46   | Phenol, 3-ethyl-5-methyl-                         | 0.49   |
| 48   | Phenol, 2-ethyl-5-methyl-                         | 0.35   |
| 49   | Phenol, 2-ethyl-4-methyl-                         | 0.22   |
| 50   | Phenol, 3-(1-methylethyl)-                        | 0.37   |
| 52   | Phenol, 2,3,5-trimethyl-                          | 0.18   |
| 54   | 3-Methyl-4-isopropylphenol                        | 0.32   |
| 56   | Phenol, 2-methyl-5-(1-methylethyl)-               | 0.26   |
| 58   | Phenol, 2,3,6-trimethyl-                          | 0.19   |
| 59   | Thymol                                            | 0.16   |
| 106  | Phenol, 2-(1,1-dimethyl-2-propenyl)-3,6-dimethyl- | 0.24   |
| 107  | 1-Naphthalenol, 2-methyl-                         | 0.27   |
| 178  | Phenol, 3-pentadecyl-                             | 0.26   |
| 211  | .beta.-Tocopherol                                 | 0.47   |
| 212  | .gamma.-Tocopherol                                | 0.8    |

**Table S10**

## Aldehydes detected in the OCOCs

| Peak | Compound name                           | RC (%) |
|------|-----------------------------------------|--------|
| 78   | 5-Formyl-2,2-dimethyl-1,3-benzodioxole  | 0.42   |
| 101  | Pentamethylbenzaldehyde                 | 0.27   |
| 136  | 1-Naphthalenecarboxaldehyde, 2-methoxy- | 0.21   |

**Table S11**

## Ethers detected in the OCOCs

| Peak | Compound name                            | RC (%) |
|------|------------------------------------------|--------|
| 69   | Benzene, 1-butyl-4-methoxy-              | 0.3    |
| 73   | Benzene, 1-(1,1-dimethylethyl)-4-ethoxy- | 0.32   |

**Table S12**

## OTCs detected in the OCOCs

| Peak | Compound name                                | RC (%) |
|------|----------------------------------------------|--------|
| 94   | Benzofuran, 2,3-dihydro-2,2,4,6-tetramethyl- | 0.59   |
| 102  | Benzofuran, 2,3-dihydro-2,2,5,6-tetramethyl- | 0.63   |



|     |                                              |      |
|-----|----------------------------------------------|------|
| 104 | 3-Hydroxy-4-methoxybenzoic acid              | 0.42 |
| 129 | 2-Propenoic acid, 3-(4-methoxyphenyl)-, (E)- | 0.17 |
| 186 | Docosanoic acid                              | 0.23 |
| 223 | Triacontanoic acid                           | 0.39 |

**Table S13**

**Attribution of infrared peak functional groups from PLC and ISP**

| Peak | Wavelength<br>(cm <sup>-1</sup> ) | Assignment                                                    | Area (%) |       |                    |
|------|-----------------------------------|---------------------------------------------------------------|----------|-------|--------------------|
|      |                                   |                                                               | PLC      | ISP   | Increasing<br>Rate |
| 1    | 3600-3500                         | OH- $\pi$                                                     | 22.01    | 5.64  | -16.37             |
| 2    | 3500-3350                         | OH-OH                                                         | 31.96    | 28.76 | -3.2               |
| 3    | 3350-3260                         | OH-ether O                                                    | 19.40    | 25.67 | +6.27              |
| 4    | 3260-3170                         | Cyclic OH                                                     | 16.99    | 36.69 | +19.7              |
| 5    | 3170-3000                         | OH-N                                                          | 9.64     | 3.24  | -6.4               |
| 6    | 3000-2930                         | Asymmetric stretching vibration of CH <sub>3</sub>            | 12.32    | 21.61 | +9.29              |
| 7    | 2930-2900                         | Asymmetric stretching vibration of CH <sub>2</sub> in alkanes | 43.08    | 38.45 | -4.63              |
| 8    | 2900-2870                         | Stretching vibration of CH in alkanes                         | 17.69    | 17.49 | -0.2               |
| 9    | 2870-2800                         | Symmetric stretching vibration of CH <sub>2</sub> in alkanes  | 26.91    | 22.45 | -4.46              |
| 10   | 1800-1700                         | Stretching vibration of C=O in carboxylic acids               | 10.26    | 5.82  | -4.44              |
| 11   | 1700-1600                         | Stretching vibration of highly conjugated C=O                 | 22.65    | 27.40 | +4.75              |
| 12   | 1600-1480                         | Stretching vibration of C=C in aromatic rings                 | 12.89    | 19.35 | +6.46              |
| 13   | 1480-1400                         | Asymmetric deformation vibration of CH <sub>3</sub>           | 15.84    | 26.18 | +10.34             |
| 14   | 1400-1240                         | Symmetric CH <sub>3</sub> -Ar, R                              | 11.65    | 9.97  | -1.68              |
| 15   | 1240-1160                         | Stretching vibration of C-OH in phenols                       | 12.36    | 5.87  | -6.49              |
| 16   | 1160-1090                         | Stretching vibration of C-O in esters                         | 9.77     | 2.50  | -7.27              |
| 17   | 1090-1030                         | Stretching vibration of C-O in alkyl ether                    | 4.58     | 2.91  | -1.67              |
| 18   | 900-860                           | Isolated aromatic hydrogens (1H)                              | 2.66     | 21.81 | +19.15             |
| 19   | 860-810                           | Two adjacent hydrogens per ring (2H)                          | 43.76    | 23.58 | -20.18             |
| 20   | 810-750                           | Three adjacent hydrogens per ring (3H)                        | 29.01    | 32.90 | +3.89              |
| 21   | 750-720                           | Four adjacent hydrogens per ring (4H)                         | 24.57    | 21.71 | -2.86              |

**Table S14**

**Alkanes from PLC and ISP pyrolysis by Py-GC/MS**

| Peak | RT (min) | Compound name | RC (%) |
|------|----------|---------------|--------|
|------|----------|---------------|--------|

|     |        |                                       | PLC  | ISP  |
|-----|--------|---------------------------------------|------|------|
| 2   | 1.658  | Cyclopropane                          |      | 5.9  |
| 5   | 1.846  | Butane                                | 4.87 |      |
| 29  | 11.707 | Undecane                              | 0.44 | 0.21 |
| 41  | 13.39  | Decane                                | 1.09 | 0.64 |
| 44  | 13.66  | 2,6-Dimethylundecane                  | 0.32 | 0.15 |
| 54  | 14.446 | 2,6,11-Trimethyldodecane              | 0.21 |      |
| 58  | 14.791 | Tridecane                             | 1.13 | 0.8  |
| 72  | 15.679 | Dodecane, 2,6,11-trimethyl-           | 0.17 |      |
| 74  | 15.919 | Dodecane                              | 1.13 | 1.15 |
| 75  | 15.963 | Cyclooctane, methyl-                  | 0.29 |      |
| 85  | 16.534 | Dodecane                              | 0.53 | 0.22 |
| 88  | 16.748 | Cyclopropane, 1-methyl-2-octyl-       | 0.14 |      |
| 90  | 16.871 | Tridecane                             | 1.14 | 1.3  |
| 92  | 17.104 | 7-Tetradecyne                         | 0.29 |      |
| 93  | 17.105 | 6-Tridecane                           |      | 0.16 |
| 113 | 18.058 | Pentadecane, 2,6,10-trimethyl-        | 0.38 | 0.23 |
| 116 | 18.17  | Tridecane, 7-cyclohexyl-              | 0.17 |      |
| 117 | 18.187 | Cyclohexane, (1,3-dimethylbutyl)      |      | 0.17 |
| 120 | 18.265 | Propane, 3-cyclohexyl-1-phenyl-       |      | 0.11 |
| 124 | 18.416 | Hexadecane                            | 0.97 | 1.9  |
| 126 | 18.711 | Cyclohexane, 2-butyl-1,1,3-trimethyl- |      | 0.12 |
| 138 | 19.078 | Hexadecane                            | 0.92 | 2    |
| 147 | 19.685 | Heptadecane                           | 0.85 | 1.3  |
| 156 | 20.225 | Cyclotetradecane                      |      | 0.89 |
| 159 | 20.257 | Pentadecane                           |      | 1.1  |
| 161 | 20.563 | Octacosane                            | 0.17 |      |
| 163 | 20.767 | Cyclopentadecane                      | 0.59 | 0.98 |
| 164 | 20.793 | Hexadecane                            | 0.82 | 1.3  |
| 173 | 21.28  | Cyclotetradecane                      |      | 0.94 |
| 175 | 21.303 | Eicosane                              | 1.61 | 1    |
| 179 | 21.417 | 17-Pentatriacontene                   |      | 0.1  |
| 182 | 21.791 | Eicosane, 2-methyl-                   | 1.82 | 1.71 |
| 187 | 22.116 | Hexadecane, 5-decyl                   |      | 0.15 |
| 190 | 22.28  | Dotriacontane                         | 1.66 | 2.2  |
| 196 | 22.776 | Hexatriacontane                       | 2.9  | 1.83 |
| 204 | 23.65  | Octane, 3,4,5,6-tetramethyl- \$       | 0.36 |      |
| 206 | 23.863 | Dotriacontane                         |      | 1.82 |
| 223 | 25.187 | Tetratetracontane                     | 1.84 | 1.83 |
| 225 | 25.992 | hexatetracontane                      | 1.31 | 1.44 |

**Table S15**

Alkenes from PLC and ISP pyrolysis by Py-GC/MS

| Peak | RT (min) | Compound name             | RC (%) |      |
|------|----------|---------------------------|--------|------|
|      |          |                           | PLC    | ISP  |
| 16   | 7.579    | 1,3,5,7-Cyclooctatetraene |        | 0.13 |
| 18   | 9.675    | 1-Decene                  | 0.23   |      |
| 23   | 10.417   | (S)-(-)-Limonene          | 0.28   | 0.23 |
| 40   | 13.258   | Dodecene                  | 0.81   | 0.45 |
| 48   | 13.945   | $\alpha$ -terpinene       |        | 0.11 |
| 55   | 14.69    | (E)-2-tetradecene         | 0.9    | 0.62 |
| 56   | 14.736   | (3E)-7-Methyl-3-undecene  | 0.24   |      |
| 57   | 14.737   | (4E)-10-Methyl-4-undecene |        | 0.23 |
| 59   | 14.846   | (2E)-2-Tridecene          | 0.54   |      |
| 60   | 14.849   | (3Z)-3-Tetradecene        |        | 0.51 |
| 62   | 14.982   | 1-Nonene                  | 0.16   |      |
| 73   | 15.839   | 1-Undecene                | 1.37   | 0.94 |
| 77   | 16.083   | 1-Dodecene                | 0.11   |      |
| 79   | 16.181   | (4E)-1,4-Undecadiene #    | 0.18   |      |
| 87   | 16.649   | (3Z)-3-Undecene-1,5-diyne |        | 0.2  |
| 89   | 16.806   | 1-Tetradecene             | 1.9    | 0.81 |
| 107  | 17.635   | 1-Pentadecene             | 0.97   | 0.99 |
| 108  | 17.689   | Hexadecane                | 1      | 1.12 |
| 110  | 17.826   | 1-Tetradecene             |        | 0.11 |
| 114  | 18.11    | 5-Octadecene, (E)-        | 0.13   |      |
| 115  | 18.112   | cis-2-Methyl-7-octadecene |        | 0.1  |
| 118  | 18.237   | 2-Decene, (Z)-            |        | 0.1  |
| 123  | 18.369   | Cetene                    | 0.88   | 0.76 |
| 124  | 18.416   | Hexadecane                | 0.97   | 1.9  |
| 125  | 18.635   | 1-Undecene, 5-methyl-     | 1.3    | 0.36 |
| 130  | 18.855   | Tetradecanal              | 0.3    | 0.14 |
| 135  | 19.035   | 1-Eicosene                | 0.82   |      |
| 136  | 19.037   | 1-Heptadecene             |        | 0.87 |
| 140  | 19.206   | 1-Tetradecene             | 0.11   |      |
| 146  | 19.652   | 1-Heptadecene             | 0.65   | 0.93 |
| 157  | 20.225   | 1-Heptadecene             | 0.58   |      |
| 184  | 21.905   | 1-Eicosene                |        | 0.8  |
| 220  | 24.82    | Supraene                  |        | 0.23 |

**Table S16**

Arenes from PLC and ISP pyrolysis by Py-GC/MS

| Peak | RT (min) | Compound name          | RC (%) |     |
|------|----------|------------------------|--------|-----|
|      |          |                        | PLC    | ISP |
| 15   | 7.084    | o-Xylene               | 0.1    |     |
| 19   | 9.753    | 1,2,4-trimethylbenzene | 0.43   |     |

|     |        |                                                      |      |      |
|-----|--------|------------------------------------------------------|------|------|
| 34  | 12.743 | 1,4,9-Decatrienyl-benzene                            | 0.35 |      |
| 50  | 14.22  | 5-Methyl-4-hexenyl-benzene                           | 0.11 |      |
| 51  | 14.33  | Hexylbenzene                                         | 0.14 |      |
| 52  | 14.396 | 1,2,3,4-tetrahydronaphthalene-1,5-diol               | 0.27 |      |
| 64  | 15.083 | 1-Methyl-naphthalene                                 | 0.2  |      |
| 65  | 15.108 | Naphthalene                                          |      | 0.13 |
| 69  | 15.497 | 1,4,5,8-tetrahydronaphthalene                        | 0.12 |      |
| 78  | 16.126 | Naphthalene, 1,2-dimethyl-                           | 0.14 |      |
| 81  | 16.32  | Naphthalene, 1,3-dimethyl-                           | 0.18 |      |
| 86  | 16.647 | Benzene, (2-methyl-1-butenyl)-                       | 0.54 |      |
| 103 | 17.536 | Benzene, eicosyl-                                    |      | 0.16 |
| 109 | 17.816 | 3-(2-Methyl-propenyl)-1H-indene                      | 0.27 |      |
| 121 | 18.32  | n-Heptadecylbenzene                                  |      | 0.2  |
| 122 | 18.32  | Benzene, decyl-                                      | 0.28 |      |
| 132 | 18.897 | :Benzene, (4,5,5-trimethyl-1,3-cyclopentadien-1-yl)- | 0.2  |      |
| 177 | 21.382 | Benzene, (3-octylundecyl)-                           | 0.13 |      |
| 203 | 23.49  | Benzene, eicosyl-                                    |      | 0.1  |
| 211 | 24.09  | Eicosane, 1-phenyl-                                  | 0.15 |      |

**Table S17**

OCOCs from PLC and ISP pyrolysis by Py-GC/MS

| Peak | RT (min) | Compound name                    | RC (%) |      |
|------|----------|----------------------------------|--------|------|
|      |          |                                  | PLC    | ISP  |
| 1    | 1.585    | Carbon dioxide                   | 23.71  | 3.85 |
| 3    | 1.76     | 1,3-Propanediol                  |        | 2.97 |
| 7    | 2.117    | DL-Alaninol                      | 0.22   |      |
| 8    | 2.373    | acetic acid                      |        | 1.04 |
| 9    | 2.561    | Tetrahydrofuran                  |        | 0.19 |
| 11   | 2.944    | cyclohepta-2,4,6-trien-1-one     | 0.9    |      |
| 12   | 3.724    | Methyl methacrylate              | 0.19   |      |
| 13   | 4.192    | 4-Methyl-2-pentanone             |        | 0.2  |
| 14   | 5.448    | 4-Methyl-3-penten-2-one          |        | 0.13 |
| 17   | 9.117    | 3-Methyl-2-cyclopenten-1-one     | 0.13   |      |
| 21   | 10.128   | Decanal                          | 0.13   |      |
| 24   | 10.588   | 2,3-dimethyl-2-cyclopenten-1-one | 0.15   |      |
| 25   | 11.137   | Cresol                           | 0.92   | 0.31 |
| 27   | 11.548   | (2E)-2-Nonenal                   | 1.4    |      |
| 28   | 11.553   | 2-Decenal                        |        | 0.69 |
| 30   | 11.766   | Nonanal                          |        | 0.22 |
| 31   | 11.767   | 3-Nonen-1-ol,                    | 0.39   |      |

|     |        |                                             |      |      |
|-----|--------|---------------------------------------------|------|------|
| 32  | 12.565 | 2-Ethyl-phenol                              | 0.08 |      |
| 33  | 12.693 | 2,6-dimethyl-Phenol                         | 0.51 | 0.31 |
| 36  | 13.026 |                                             | 0.33 |      |
| 37  | 13.064 | 2,5-dimethyl-Phenol                         | 0.1  | 0.15 |
| 38  | 13.075 | 2,3-dimethyl-Phenol                         | 0.32 |      |
| 43  | 13.56  | 2-Ethyl-6-methyl-phenol                     |      | 0.2  |
| 46  | 13.764 | ethenoxybenzene                             | 0.1  |      |
| 47  | 13.932 | 2,4-Hexadiyn-1,6-diol                       | 0.43 |      |
| 49  | 14.089 | 2-ethyl-5-methyl-Phenol                     | 0.14 |      |
| 53  | 14.402 | 2,3,6-Trimethylphenol                       |      | 0.09 |
| 63  | 15.04  | 4-Hydroxybenzyl alcohol                     | 0.17 |      |
| 66  | 15.167 | p-Allylphenol                               | 0.1  |      |
| 67  | 15.435 | 2-Decyn-1-ol                                | 0.33 |      |
| 68  | 15.437 | (E)-2-tridecen-1-al                         |      | 0.14 |
| 82  | 16.408 | 2-Nonenal, (E)-                             | 0.16 |      |
| 84  | 16.477 | 2-Hexyl-1-octanol                           |      | 0.16 |
| 94  | 17.186 | Cyclopropanecarboxylic acid                 |      | 0.14 |
| 95  | 17.187 | 1-Naphthalenol                              | 0.24 |      |
| 96  | 17.213 | 1,1,4,5,6-Pentamethyl-2,3-dihydro-1H-indene | 0.14 |      |
| 97  | 17.265 | 1-Naphthalenol                              | 0.19 | 0.9  |
| 101 | 17.409 | Hexadecanal                                 |      | 0.1  |
| 102 | 17.478 | 3-Methyl-5-phenylpentan-1-ol                | 0.27 | 0.25 |
| 111 | 18.021 | 1-Methyl-2-naphthol                         | 0.25 |      |
| 112 | 18.022 | 1-Hydroxy-1,2,3,4-tetrahydronaph            |      | 0.17 |
| 119 | 18.262 | 2-(2-Phenyl-cyclohexyl)-ethanol             | 0.3  |      |
| 127 | 18.711 | 1-Nonanol, 4,8-dimethyl-                    | 0.48 |      |
| 129 | 18.777 | 2,5-Dimethyl-3-phenylfuran                  |      | 0.11 |
| 131 | 18.897 | Decanoic acid                               |      | 0.18 |
| 142 | 19.363 | Succinic acid                               |      | 0.8  |
| 143 | 19.433 | Hexadecanoic acid                           |      | 0.1  |
| 144 | 19.53  | Pentadecanal-                               |      | 0.11 |
| 149 | 19.723 | 2-Heptadecanone                             | 0.54 |      |
| 152 | 19.804 | 2-Undecene, 9-methyl-, (E)-                 |      | 0.14 |
| 151 | 19.839 | Methyl 4-methyloctanoate                    | 0.9  |      |
| 153 | 19.963 | Phenol, 2-undecyl-                          | 0.9  |      |
| 160 | 20.432 | 1-Heneicosanol                              | 0.9  |      |
| 166 | 20.847 | 2-Hexadecanone                              | 0.45 | 0.35 |
| 169 | 20.938 | Pentadecanoic acid, methyl ester            |      | 0.1  |
| 171 | 21.113 | 11-Tridecen-1-ol                            |      | 0.16 |
| 176 | 21.363 | 1-Methylcyclohexyl acetate                  |      | 0.9  |

|     |        |                                               |      |      |
|-----|--------|-----------------------------------------------|------|------|
| 185 | 22.011 | 2-Propenoic acid, 3-(4-methoxyphenyl)-        | 0.13 |      |
| 189 | 22.193 | trans-2-Pinanol                               | 0.17 |      |
| 205 | 23.743 | 4-tert-Butylcyclohexyl acetate                | 0.28 |      |
| 208 | 23.97  | Cyclopropaneoctanoic acid                     | 0.9  |      |
| 218 | 24.733 | Ethanol, 2-(9-octadecenyl)-                   |      | 0.12 |
| 219 | 24.734 | Pentadecanal-                                 | 0.13 |      |
| 221 | 24.83  | 2,6,10-Dodecatrienoic acid, 3,7,11-trimethyl- | 0.1  |      |
| 222 | 24.91  | Cyclopropaneundecanal, 2-nonyl-               | 0.22 |      |
| 228 | 26.243 | 2H-Pyran, 2-(7-heptadecyloxy)tetrahydro-      | 0.67 |      |
| 234 | 27.572 | Ergost-25-ene-3,5,6,12-tetrol                 | 0.31 |      |

**Table S18**

NCOCs from PLC and ISP pyrolysis by Py-GC/MS

| Peak | RT (min) | Compound name                                | RC (%) |      |
|------|----------|----------------------------------------------|--------|------|
|      |          |                                              | PLC    | ISP  |
| 6    | 2.079    | Hydrazinecarboxylic acid, 1-methylethylester |        | 0.27 |
| 7    | 2.117    | DL-Alaninol                                  | 0.22   |      |
| 10   | 2.927    | Carbamimidothioic acid, 1-methylethyl ester  |        | 0.14 |
| 20   | 9.879    | Phenyl carbamate                             | 1.98   | 0.29 |
| 61   | 14.98    | Diaziridinone                                |        | 0.22 |
| 66   | 15.167   | p-Allylphenol                                | 0.1    |      |
| 70   | 15.597   | 3-methyl-2-nitrobenzyl alcohol               | 0.53   |      |
| 134  | 18.986   | Propane, 3-cyclohexyl-1-phenyl-              | 0.34   |      |
| 172  | 21.193   | Benzenamine, 4,4'-methylenebis-              | 0.46   | 0.32 |
| 188  | 22.188   | 9-Octadecenamide, (Z)-                       |        | 0.28 |
| 197  | 22.834   | 9-Octadecenitrile, (Z)-                      | 2.68   | 3.45 |
| 198  | 22.926   | Nonadecanenitrile                            |        | 0.19 |
| 214  | 24.516   | 9-Octadecenamide, (Z)-                       |        | 1.24 |
| 215  | 24.627   | Octadecanamide                               |        | 0.24 |
| 226  | 26.07    | 9-Octadecenamide, (Z)-                       |        | 0.11 |

**Table S19**

Alcohols detected in the OCOCs from PLC and ISP

| Peak | RT (min) | Compound name                   | RC (%) |      |
|------|----------|---------------------------------|--------|------|
|      |          |                                 | PLC    | ISP  |
| 3    | 1.76     | 1,3-Propanediol                 |        | 2.97 |
| 7    | 2.117    | DL-Alaninol                     | 0.22   |      |
| 31   | 11.767   | 3-Nonen-1-ol,                   | 0.39   |      |
| 47   | 13.932   | 2,4-Hexadiyn-1,6-diol           | 0.43   |      |
| 63   | 15.04    | 4-Hydroxybenzyl alcohol         | 0.17   |      |
| 67   | 15.435   | 2-Decyn-1-ol                    | 0.33   |      |
| 84   | 16.477   | 2-Hexyl-1-octanol               |        | 0.16 |
| 102  | 17.478   | 3-Methyl-5-phenylpentan-1-ol    | 0.27   | 0.25 |
| 119  | 18.262   | 2-(2-Phenyl-cyclohexyl)-ethanol | 0.3    |      |
| 127  | 18.711   | 1-Nonanol, 4,8-dimethyl-        | 0.48   |      |
| 160  | 20.432   | 1-Heneicosanol                  | 0.9    |      |
| 171  | 21.113   | 11-Tridecen-1-ol                |        | 0.16 |
| 189  | 22.193   | trans-2-Pinanol                 | 0.17   |      |
| 218  | 24.733   | Ethanol, 2-(9-octadecenyl)-     |        | 0.12 |
| 234  | 27.572   | Ergost-25-ene-3,5,6,12-tetrol   | 0.31   |      |

**Table S20**

Ketones detected in the OCOCs from PLC and ISP

| Peak | RT (min) | Compound name                    | RC (%) |      |
|------|----------|----------------------------------|--------|------|
|      |          |                                  | PLC    | ISP  |
| 11   | 2.944    | cyclohepta-2,4,6-trien-1-one     | 0.9    |      |
| 13   | 4.192    | 4-Methyl-2-pentanone             |        | 0.2  |
| 14   | 5.448    | 4-Methyl-3-penten-2-one          |        | 0.13 |
| 24   | 10.588   | 2,3-dimethyl-2-cyclopenten-1-one | 0.15   |      |
| 149  | 19.723   | 2-Heptadecanone                  | 0.54   |      |
| 166  | 20.847   | 2-Hexadecanone                   | 0.45   | 0.35 |

**Table S21**

Esters detected in the OCOCs from PLC and ISP

| Peak | RT (min) | Compound name                    | RC (%) |     |
|------|----------|----------------------------------|--------|-----|
|      |          |                                  | PLC    | ISP |
| 12   | 3.724    | Methyl methacrylate              | 0.19   |     |
| 151  | 19.839   | Methyl 4-methyloctanoate         | 0.9    |     |
| 169  | 20.938   | Pentadecanoic acid, methyl ester |        | 0.1 |
| 176  | 21.363   | 1-Methylcyclohexyl acetate       |        | 0.9 |
| 205  | 23.743   | 4-tert-Butylcyclohexyl acetate   | 0.28   |     |

**Table S22**

Phenols detected in the OCOCs from PLC and ISP

| Peak | RT (min) | Compound name | RC (%) |
|------|----------|---------------|--------|
|------|----------|---------------|--------|

|     |        |                         | PLC  | ISP  |
|-----|--------|-------------------------|------|------|
| 25  | 11.137 | Cresol                  | 0.92 | 0.31 |
| 32  | 12.565 | 2-Ethyl-phenol          | 0.08 |      |
| 33  | 12.693 | 2,6-dimethyl-Phenol     | 0.51 | 0.31 |
| 36  | 13.026 | 4-Ethyl-phenol          | 0.33 |      |
| 37  | 13.064 | 2,5-dimethyl-Phenol     | 0.1  | 0.15 |
| 38  | 13.075 | 2,3-dimethyl-Phenol     | 0.32 |      |
| 43  | 13.56  | 2-Ethyl-6-methyl-phenol |      | 0.2  |
| 49  | 14.089 | 2-ethyl-5-methyl-Phenol | 0.14 |      |
| 53  | 14.402 | 2,3,6-Trimethyl-phenol  |      | 0.09 |
| 66  | 15.167 | p-Allyl-phenol          | 0.1  |      |
| 95  | 17.187 | 1-Naphthalenol          | 0.24 |      |
| 111 | 18.021 | 1-Methyl-2-naphthol     | 0.25 |      |
| 153 | 19.963 | Phenol, 2-undecyl-      | 0.9  |      |

**Table S23**

Aldehydes detected in the OCOCs from PLC and ISP

| Peak | RT (min) | Compound name                   | RC (%) |      |
|------|----------|---------------------------------|--------|------|
|      |          |                                 | PLC    | ISP  |
| 21   | 10.128   | Decanal                         | 0.13   |      |
| 27   | 11.548   | (2E)-2-Nonenal                  | 1.4    |      |
| 28   | 11.553   | 2-Decenal                       |        | 0.69 |
| 30   | 11.766   | Nonanal                         |        | 0.22 |
| 68   | 15.437   | (E)-2-tridecen-1-al             |        | 0.14 |
| 82   | 16.408   | 2-Nonenal, (E)-                 | 0.16   |      |
| 101  | 17.409   | Hexadecanal                     |        | 0.1  |
| 144  | 19.53    | Pentadecanal-                   |        | 0.11 |
| 219  | 24.734   | Pentadecanal-                   | 0.13   |      |
| 222  | 24.91    | Cyclopropaneundecanal, 2-nonyl- | 0.22   |      |

**Table S24**

Ethers detected in the OCOCs from PLC and ISP

| Peak | RT (min) | Compound name   | RC (%) |     |
|------|----------|-----------------|--------|-----|
|      |          |                 | PLC    | ISP |
| 46   | 13.764   | ethenoxybenzene | 0.1    |     |

**Table S25**

OTCs detected in the OCOCs from PLC and ISP

| Peak | RT (min) | Compound name                               | RC (%) |      |
|------|----------|---------------------------------------------|--------|------|
|      |          |                                             | PLC    | ISP  |
| 1    | 1.585    | Carbon dioxide                              | 23.71  | 3.85 |
| 8    | 2.373    | acetic acid                                 |        | 1.04 |
| 9    | 2.561    | Tetrahydrofuran                             |        | 0.19 |
| 94   | 17.186   | Cyclopropanecarboxylic acid                 |        | 0.14 |
| 96   | 17.213   | 1,1,4,5,6-Pentamethyl-2,3-dihydro-1H-indene | 0.14   |      |



|     |        |                                                     |      |
|-----|--------|-----------------------------------------------------|------|
| 112 | 18.022 | 1-Hydroxy-1,2,3,4-tetrahydronaph                    | 0.17 |
| 129 | 18.777 | 2,5-Dimethyl-3-phenylfuran                          | 0.11 |
| 131 | 18.897 | Decanoic acid                                       | 0.18 |
| 142 | 19.363 | Succinic acid                                       | 0.8  |
| 143 | 19.433 | Hexadecanoic acid                                   | 0.1  |
| 152 | 19.804 | 2-Undecene, 9-methyl-, (E)-                         | 0.14 |
| 185 | 22.011 | 2-Propenoic acid, 3-(4-methoxyphenyl)-              | 0.13 |
| 208 | 23.97  | Cyclopropanoic acid                                 | 0.9  |
| 221 | 24.83  | 2,6,10-Dodecatricarboxylic acid, 3,7,11-trimethyl-, | 0.1  |
| 228 | 26.243 | 2H-Pyran, 2-(7-heptadecyloxy)tetrahydro-            | 0.67 |

**Table S26**

Nomenclature

| Full name                             | Nomenclature    |
|---------------------------------------|-----------------|
| Relative abundance (%)                | RA              |
| Relative content (area %)             | RC              |
| Oxygen-containing organic compounds   | OCOCs           |
| Other compounds                       | OCs             |
| Nitrogen-containing organic compounds | NCOCs           |
| Moisture content                      | M               |
| Ash content                           | A               |
| Volatile matter content               | VM              |
| Fixed carbon content                  | FC              |
| Aliphatic carbon                      | C <sub>al</sub> |
| Aromatic carbon                       | C <sub>ar</sub> |
